# Supplementary material for: Monitoring the physical and insecticidal durability of the long-lasting insecticidal net DawaPlus® 2.0 in three States in Nigeria
Source: Springer Nature journal article supplement (doi:10.1186/s12936-020-03194-9), 2020-03-30
Supplement: MOESM1 [file 17844866]

## Additional file 1

Hypothetical loss functions with defined median survival

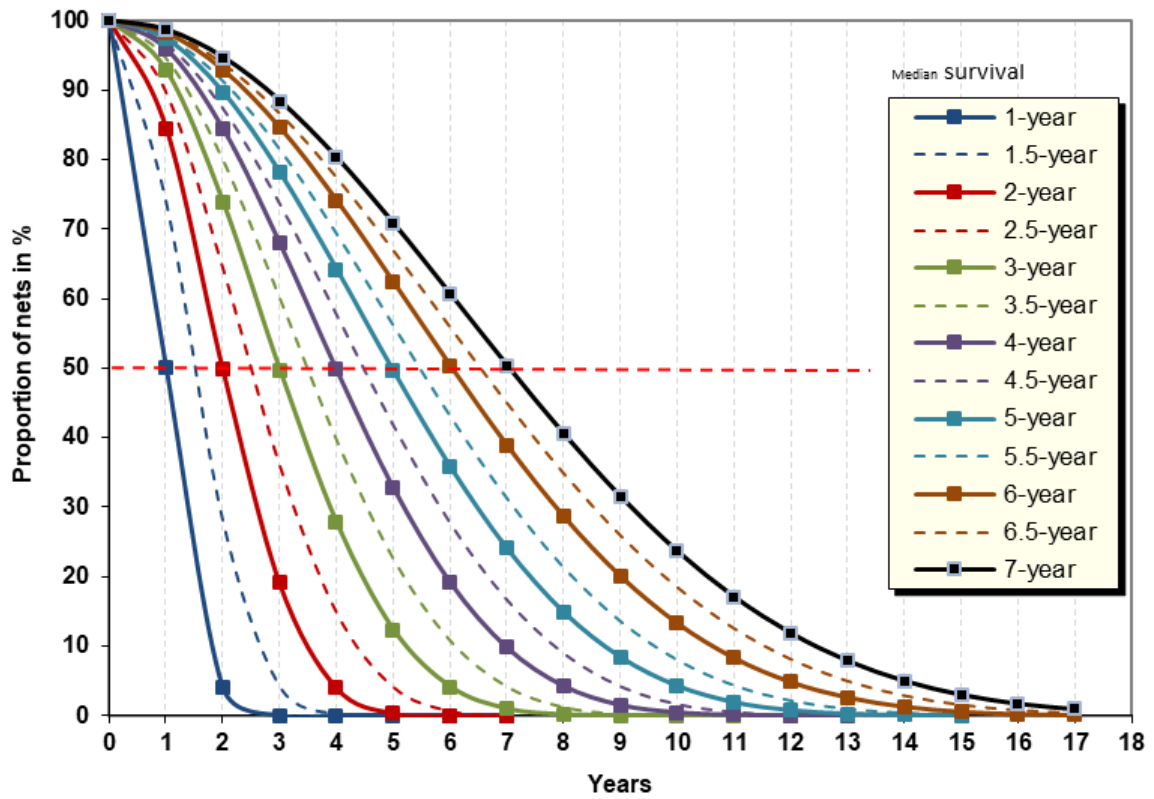

Formula for loss function

$$f(t) = \begin{cases} 100 \times \exp \left[ k - \frac{k}{1 - (t/L)^2} \right] & \text{if } t < L, \\ 0 & \text{if } t \geq L, \end{cases}$$

Values for t, L and k

| t (years) | L     | k    |
|-----------|-------|------|
| 1.0       | 4.76  | 15.0 |
| 1.5       | 7.28  | 15.5 |
| 2.0       | 9.80  | 16.0 |
| 2.5       | 12.45 | 16.5 |
| 3.0       | 15.10 | 17.0 |
| 3.5       | 17.90 | 17.5 |
| 4.0       | 20.70 | 18.0 |
| 4.5       | 23.60 | 18.5 |
| 5.0       | 26.50 | 19.0 |
| 5.5       | 29.50 | 19.5 |
| 6.0       | 34.50 | 22.0 |
| 6.5       | 38.25 | 23.0 |
| 7.0       | 42.00 | 24.0 |
