# Supplementary material for: Monitoring the physical and insecticidal durability of the long-lasting insecticidal net DawaPlus® 2.0 in three States in Nigeria
Source: Springer Nature journal article supplement (doi:10.1186/s12936-020-03194-9), 2020-03-30
Supplement: MOESM2 [file 17844866]

## Additional file 2

### Household characteristics

Table: Household characteristics based on households that were seen at baseline and endline surveys.

| Variable                               | Zamfara          | Ebonyi           | Oyo              | P-value<br>for comparison<br>between sites |
|----------------------------------------|------------------|------------------|------------------|--------------------------------------------|
|                                        | % (95% CI)*      | % (95% CI)*      | % (95% CI)*      |                                            |
| <b>Demographic</b>                     |                  |                  |                  |                                            |
| Mean number of de-jure members         | 5.5 (5.1-6.0)    | 5.0 (4.5-5.4)    | 4.4 (4.0-4.8)    | 0.03                                       |
| Mean age of head of household in years | 41.6 (39.6-43.6) | 51.1 (48.7-53.5) | 50.0 (46.4-53.6) | 0.09                                       |
| Proportion of female headed households | 1.9 (0.6-5.7)    | 8.5 (5.5-12.8)   | 22.6 (15.2-32.2) | <0.0001                                    |
| Proportion of under-fives              | 22.4 (11.4-16.6) | 13.8 (11.4-16.6) | 10.3 (8.1-13.1)  | <0.0001                                    |
| Education of male heads of household   |                  |                  |                  |                                            |
| Non-literate                           | 40.6 (29.1-53.3) | 34.5 (23.8-47.1) | 30.2 (16.5-48.7) | 0.0003                                     |
| Primary                                | 40.6 (28.5-54.0) | 16.5 (10.5-25.0) | 15.1 ( 9.2-23.7) |                                            |
| Secondary                              | 18.8 (12.6-27.0) | 49.0 (36.1-62.0) | 54.7 (37.5-70.9) |                                            |
| <b>House characteristics</b>           |                  |                  |                  |                                            |
| Improved roof materials                | 1.5 (0.5-4.6)    | 1.3 (0.3-5.4)    | 1.4 (0.5-3.7)    | 0.9                                        |
| Improved wall materials                | 2.3 (1.0-5.1)    | 44.0 (28.0-61.0) | 78.4 (59.2-90.1) | <0.0001                                    |
| Improved floor materials               | 3.0 (0.8-10.9)   | 37.2 (22.9-54.2) | 75.2 (54.7-88.4) | <0.0001                                    |
| Cooking fuel kerosene or gas           | 0.0 (-.-)        | 3.8 (1.3-11.1)   | 51.4 (30.2-72.1) | <0.0001                                    |
| <b>Water and sanitation</b>            |                  |                  |                  |                                            |
| Access to safe water                   | 97.4 (82.2-29.1) | 14.1 (6.2-29.1)  | 92.7 (75.1-98.2) | <0.0001                                    |
| Access to any latrine                  | 100 (-.-)        | 72.7 (60.2-82.4) | 66.5 (41.6-84.7) | 0.004                                      |
| Improved latrine or flush toilet       | 0.4 (0.1-2.8)    | 1.7 (0.7-4.2)    | 39.9 (20.0-63.8) | <0.0001                                    |
| <b>Household assets</b>                |                  |                  |                  |                                            |
| Any transport                          | 72.0 (59.7-81.7) | 82.9 (75.1-88.7) | 41.3 (30.8-52.6) | <0.0001                                    |
| Type of transport                      |                  |                  |                  |                                            |
| Bicycle                                | 48.9 (38.8-59.0) | 59.0 (42.6-73.6) | 3.2 ( 1.2- 8.4)  | <0.0001                                    |
| Motorcycle                             | 35.2 (25.7-46.1) | 62.0 (56.5-67.1) | 24.8 (14.3-39.4) | 0.0001                                     |
| Car                                    | 4.2 ( 1.9- 8.9)  | 7.7 ( 3.8-14.9)  | 19.3 (12.7-28.1) | 0.0006                                     |
| Owns farm land                         | 99.2 (97.1-99.8) | 85.0 (69.2-93.5) | 47.7 (29.3-66.8) | <0.0001                                    |
| Owns livestock                         | 90.9 (82.5-95.5) | 79.9 (69.5-87.4) | 68.4 (55.2-79.1) | 0.003                                      |
| Type of livestock                      |                  |                  |                  |                                            |
| Chicken                                | 65.9 (57.0-73.8) | 71.4 (59.4-81.0) | 54.1 (39.8-67.8) | 0.1                                        |
| Goats                                  | 79.2 (71.0-85.5) | 51.7 (38.4-64.7) | 37.2 (23.5-53.2) | <0.0001                                    |
| Cows                                   | 34.5 (21.1-50.9) | 13.7 ( 5.3-31.2) | 0.9 ( 0.2- 3.4)  | 0.0005                                     |
| Household items owned                  |                  |                  |                  |                                            |
| Radio                                  | 66.7 (58.4-74.0) | 92.7 (88.8-95.3) | 87.6 (78.6-93.2) | <0.0001                                    |
| Television                             | 9.8 ( 5.0-18.5)  | 41.0 (29.3-53.9) | 61.0 (37.9-80.0) | 0.0001                                     |
| Refrigerator                           | 0.8 ( 0.2- 3.0)  | 6.4 ( 2.8-14.2)  | 39.9 (23.1-59.7) | <0.0001                                    |
| Fan                                    | 8.3 ( 4.1-16.4)  | 16.2 ( 9.4-26.7) | 54.6 (31.5-75.9) | <0.0001                                    |
| Iron                                   | 4.9 ( 2.2-10.9)  | 13.7 ( 6.8-25.5) | 47.9 (27.8-68.7) | <0.0001                                    |
| Any mobile phone                       | 65.5 (54.5-75.1) | 48.7 (33.9-63.7) | 83.5 (66.1-92.9) | 0.005                                      |
| Smartphone or computer                 | 0.8 ( 0.1- 5.6)  | 0.4 ( 0.1- 3.2)  | 31.2 (18.5-47.8) | <0.0001                                    |

\*Unless otherwise indicated in column 1
