# Supplementary material for: Monitoring the physical and insecticidal durability of the long-lasting insecticidal net DawaPlus® 2.0 in three States in Nigeria
Source: Springer Nature journal article supplement (doi:10.1186/s12936-020-03194-9), 2020-03-30

### Additional File 3

#### Survival functions intention to treat vs. per-protocol

Kaplan-Meier survival functions of cohort nets comparing risk starting at distribution (intention to treat) versus starting at first hanging (per protocol)

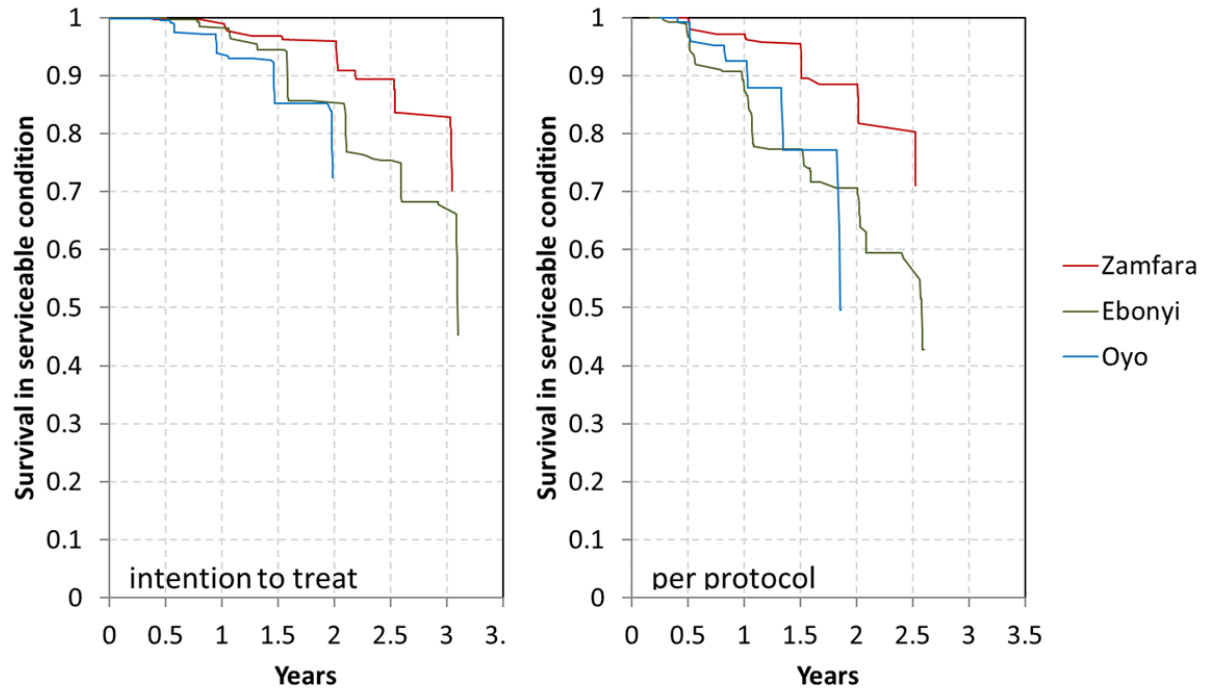

Supplement: MOESM3 [file 17844866]
